# Supplementary material
Source: publisher site journal article supplement (https://www.dovepress.com/article/586128)
Supplement: Supplementary file 1 [file Supplementary%20Material.docx]

Supplementary Material

Supplementary Table 1 Components of the Mayo Endoscopic Score.

| Components of the Mayo Endoscopic Score |
| --- |
| 0 = Normal or inactive disease |
| 1 = Mild disease (erythema, decreased vascular pattern, mild friability) |
| 2 = Moderate disease (marked erythema, absent vascular pattern, friability, erosions) |
| 3 = Severe disease (spontaneous bleeding, ulceration) |

Supplementary Table 2 Components of the UCEIS

| Components of the UCEIS |
| --- |
| Vascular pattern |
| 0 = Normal vascular pattern with arborization of capillaries clearly defined or with blurring or patchy loss of capillary margins |
| 1 = Patchy obliteration of vascular pattern |
| 2 = Complete obliteration of vascular pattern |
| Bleeding |
| 0 = No visible blood |
| 1 = Some spots or streaks of coagulated blood on the surface of the mucosa ahead of the scope that can be washed away |
| 2 = Some free liquid blood in the lumen |
| 3 = Frank blood in the lumen ahead of the endoscope or visible oozing from the mucosa after washing intraluminal blood, or visible oozing from a hemorrhagic mucosa |
| Erosions and ulcers |
| 0 = Normal mucosa, no visible erosions or ulcers |
| 1 = Tiny (≤5 mm) defects in the mucosa of a white or yellow color with a flat edge |
| 2 = Larger (>5 mm) defects in the mucosa, which are discrete fibrin-covered ulcers when compared with erosions, but remain superficial |
| 3 = Deeper excavated defects in the mucosa with a slightly raised edge |

Abbreviations: UCEIS, Ulcerative Colitis Endoscopic Index of Severity.

Supplementary Table 3 Components of the SESCD

| Components of the SESCD |
| --- |
| Size of ulcers |
| 0 = None |
| 1 = Aphthous ulcers (diameters: 0.1 to 0.5 cm) |
| 2 = Large ulcers (diameters: 0.5 to 2 cm) |
| 3 = Very large ulcers (diameters: >2cm) |
| Ulcerated surface |
| 0 = None |
| 1 = <10% |
| 2 = 10-30% |
| 3 = >30% |
| Affected surface |
| 0 = Unaffected segment |
| 1 = <50% |
| 2 = 50-75% |
| 3 = >75% |
| Presence of narrowings |
| 0 = None |
| 1 = Single, can be passed |
| 2 = Multiple, can be passed |
| 3 = Cannot be passed |

Abbreviations: SESCD, Simplified Endoscopic Score for Crohn's Disease.

Supplementary Table 4 Kruskal-Wallis Test

|  | Hb/WBC | Hb/Neu | Hb/PLT | Hb/CRP |
| --- | --- | --- | --- | --- |
| H value for UC grouping by UCEIS | 57.697 | 59.085 | 59.863 | 92.914 |
| P | <0.001 | <0.001 | <0.001 | <0.001 |
| H value for CD grouping by SESCD | 14.598 | 19.662 | 9.830 | 40.296 |
| P | 0.002 | <0.001 | 0.020 | <0.001 |

Abbreviations: UC, ulcerative colitis; Mayo, UCEIS, Ulcerative Colitis Endoscopic Index of Severity; CD, Crohn's disease; SESCD, Simplified Endoscopic Score for Crohn's Disease; Hb/WBC, hemoglobin-to-white blood cell ratio; Hb/Neu, hemoglobin-to-neutrophil ratio; Hb/PLT, hemoglobin-to-platelet ratio; Hb/CRP, hemoglobin-to-C-reactive protein ratio.

Supplementary Table 5 Sensitivity analyses stratified by anemia status

|  | Anemia status | P | AUC (95% CI) |
| --- | --- | --- | --- |
| UC Mayo |  |  |  |
| Hb/WBC | With anemia | 0.010 | 0.759(0.604-0.915) |
|  | Without anemia | ＜0.001 | 0.695(0.593-0.796) |
| Hb/Neu | With anemia | 0.026 | 0.724(0.553-0.896) |
|  | Without anemia | ＜0.001 | 0.694(0.593-0.795) |
| Hb/PLT | With anemia | ＜0.001 | 0.892(0.809-0.975) |
|  | Without anemia | ＜0.001 | 0.723(0.629-0.817) |
| Hb/CRP | With anemia | ＜0.001 | 0.978(0.939-1.000) |
|  | Without anemia | ＜0.001 | 0.871(0.802-0.940) |
| UC UCEIS |  |  |  |
| Hb/WBC | With anemia | 0.073 | 0.699(0.521-0.876) |
|  | Without anemia | 0.001 | 0.674(0.575-0.773) |
| Hb/Neu | With anemia | 0.097 | 0.684(0.488-0.880) |
|  | Without anemia | 0.001 | 0.677(0.578-0.775) |
| Hb/PLT | With anemia | 0.002 | 0.841(0.741-0.941) |
|  | Without anemia | 0.003 | 0.661(0.562-0.759) |
| Hb/CRP | With anemia | ＜0.001 | 0.951(0.891-1.000) |
|  | Without anemia | ＜0.001 | 0.829(0.752-0.905) |
| CD SESCD |  |  |  |
| Hb/WBC | With anemia | 0.041 | 0.870(0.732-1.000) |
|  | Without anemia | 0.795 | 0.519(0.375-0.662) |
| Hb/Neu | With anemia | 0.033 | 0.884(0.744-1.000) |
|  | Without anemia | 0.594 | 0.538(0.395-0.682) |
| Hb/PLT | With anemia | 0.185 | 0.739(0.494-0.984) |
|  | Without anemia | 0.743 | 0.524(0.386-0.662) |
| Hb/CRP | With anemia | 0.356 | 0.667(0.196-1.000) |
|  | Without anemia | ＜0.001 | 0.821(0.722-0.920) |


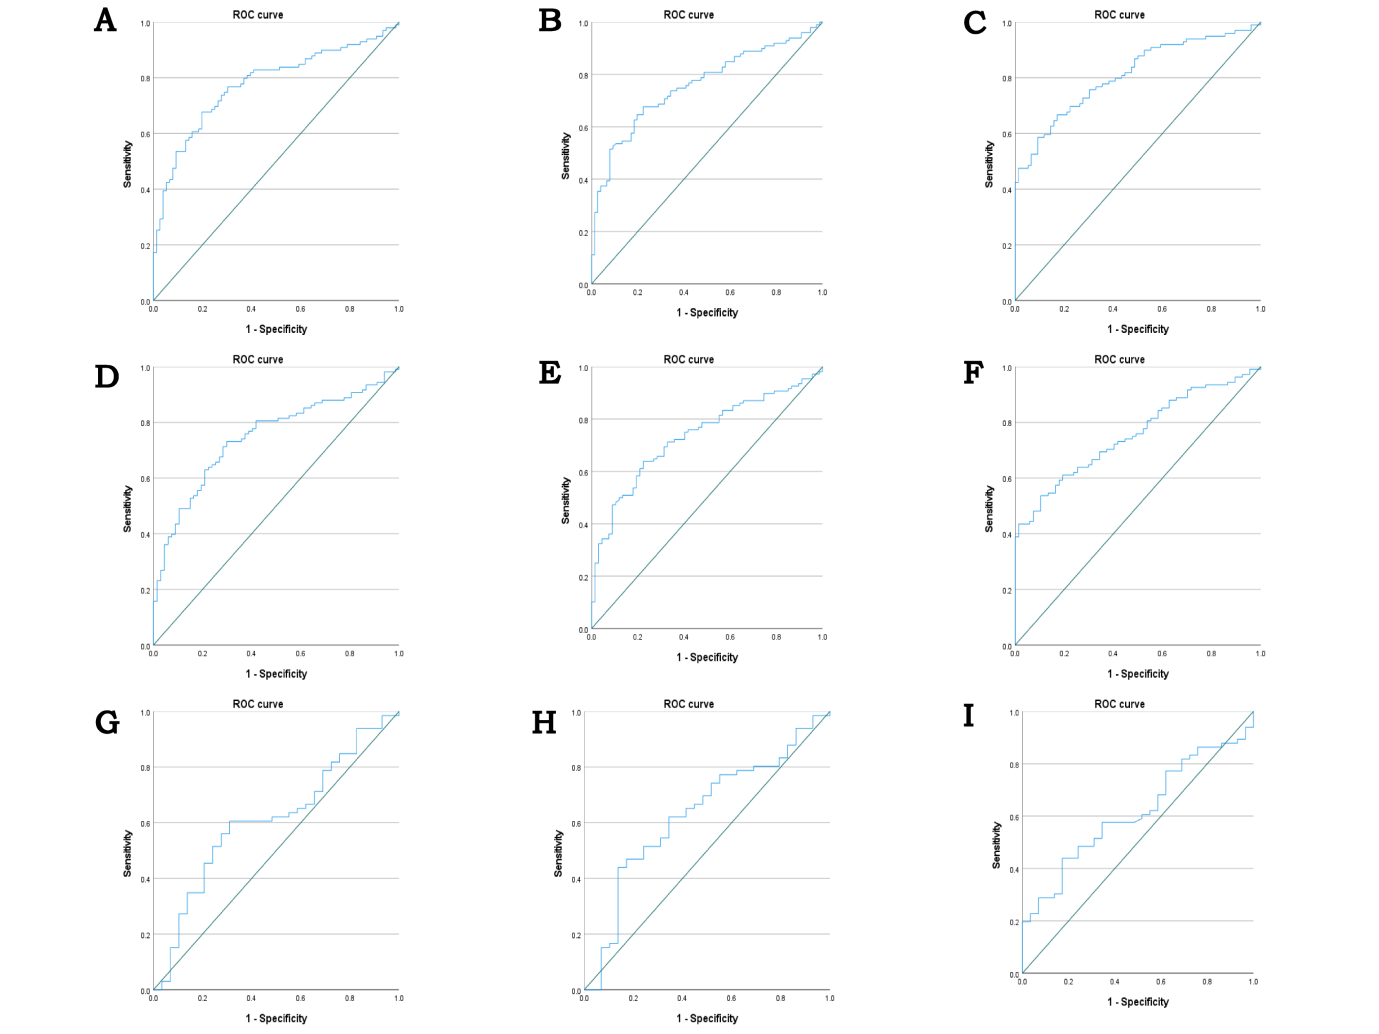


Supplementary Figure 1 ROC curve of ratio index. A-C: Hb/WBC for UC grouping by Mayo Endoscopic Score (AUC=0.777, 95% CI: 0.708-0.846, P<0.001), Hb/Neu for UC grouping by Mayo Endoscopic Score (AUC=0.759, 95% CI: 0.688-0.829, P<0.001), Hb/PLT for UC grouping by Mayo Endoscopic Score (AUC=0.810, 95% CI: 0.747-0.873, P<0.001); D-F: Hb/WBC for UC grouping by UCEIS Score (AUC=0.747, 95% CI: 0.675-0.820, P<0.001), Hb/Neu for UC grouping by UCEIS Score (AUC=0.735, 95% CI: 0.662-0.809, P<0.001), Hb/PLT for UC grouping by UCEIS Score (AUC=0.756, 95% CI: 0.687-0.826, P<0.001); G-I: Hb/WBC for CD grouping by SES-CD Score (AUC=0.611, 95% CI: 0.489-0.732, P=0.087), Hb/Neu for CD grouping by SES-CD Score (AUC=0.633, 95% CI: 0.512-0.755, P=0.039), Hb/PLT for CD grouping by SES-CD Score (AUC=0.615, 95% CI: 0.501-0.730, P=0.075).


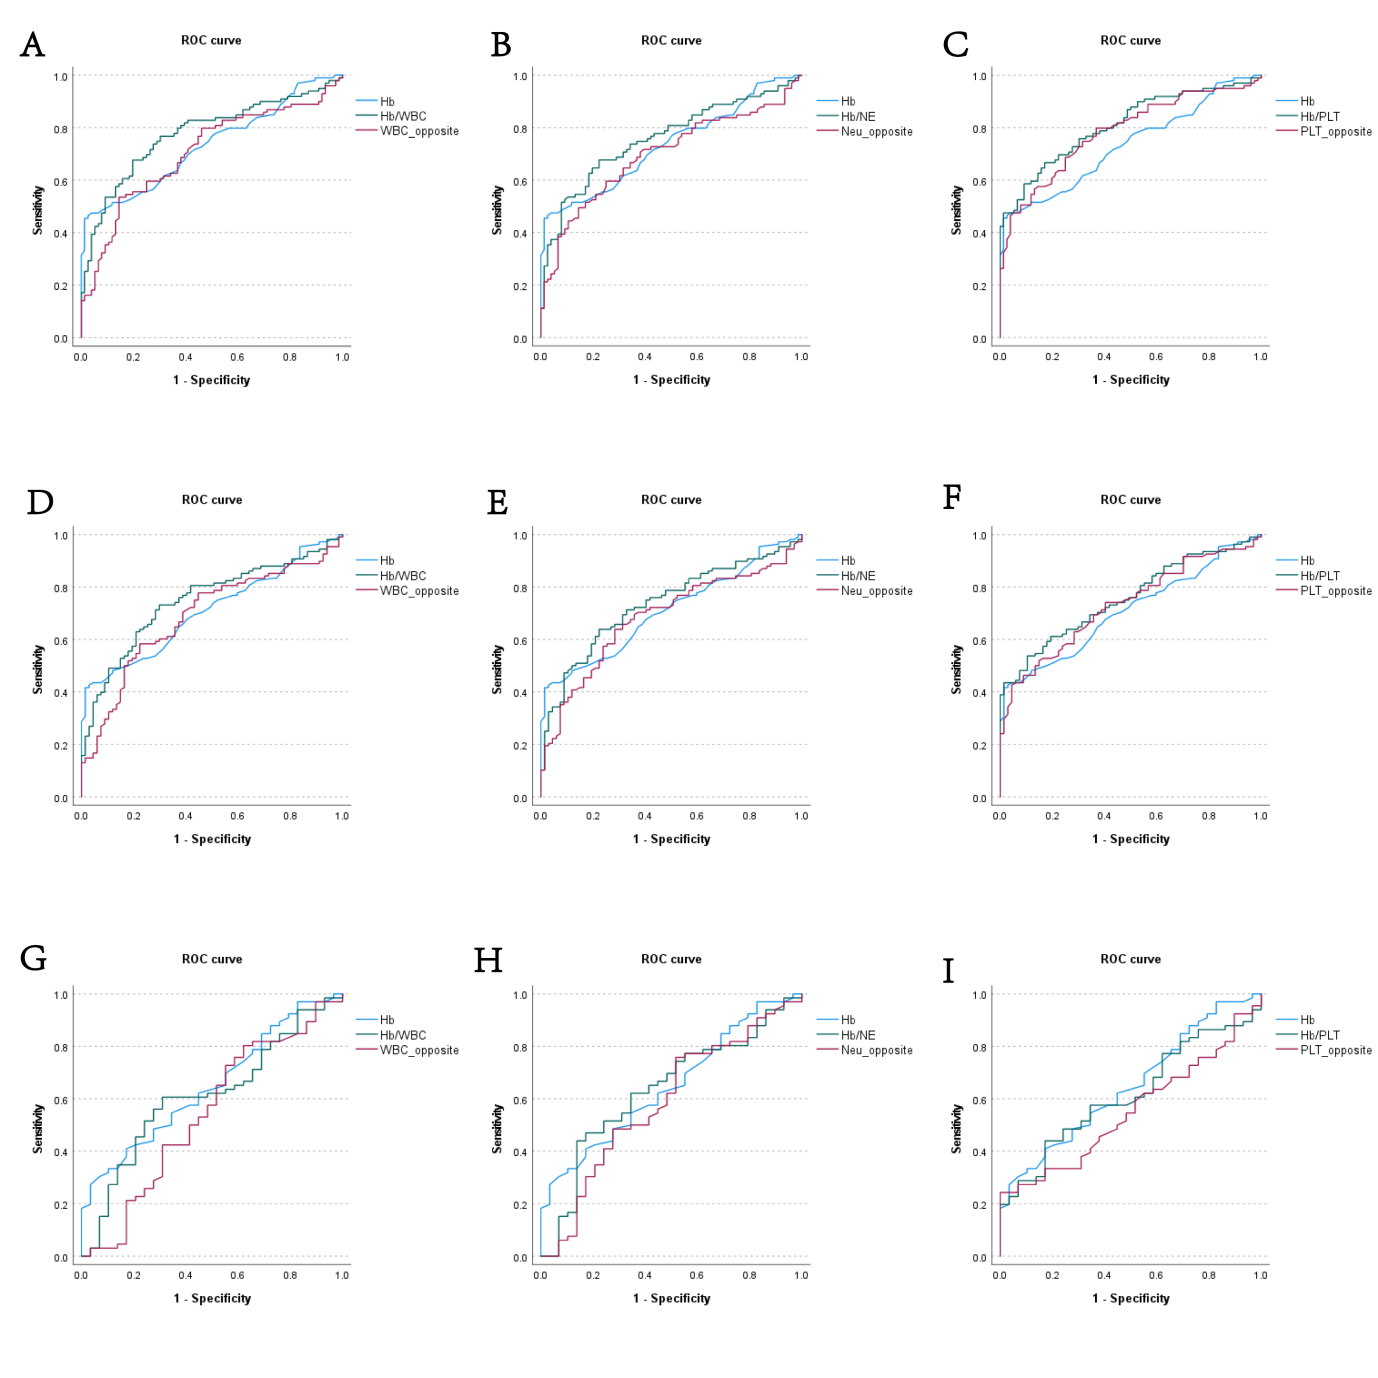


Supplementary Figure 2 ROC analysis of single index and ratio index. A-C: When using the Mayo Endoscopic Score to classify UC disease activity, the single indicators Hb (AUC=0.733), WBC (AUC=0.705), Neu (AUC=0.697), and PLT (AUC=0.783) were compared with their corresponding ratio indicators Hb/WBC (AUC=0.777), Hb/Neu (AUC=0.759), and Hb/PLT (AUC=0.810). D-F: When using the UCEIS score to classify UC disease activity, the single indicators Hb (AUC=0.707), WBC (AUC=0.688), Neu (AUC=0.684), and PLT (AUC=0.731) were compared with their corresponding ratio indicators Hb/WBC (AUC=0.747), Hb/Neu (AUC=0.735), and Hb/PLT (AUC=0.756). G-I: When using the SES-CD score to classify CD disease activity, the single indicators Hb (AUC=0.647), WBC (AUC=0.542), Neu (AUC=0.588), and PLT (AUC=0.551) were compared with their corresponding ratio indicators Hb/WBC (AUC=0.611), Hb/Neu (AUC=0.633), and Hb/PLT (AUC=0.615).* Since SPSS software requires consistency in testing direction between single metrics and ratio metrics during ROC analysis, the inverse values of WBC, Neu, PLT, and CRP were analyzed, yielding AUC values consistent with those previously reported.


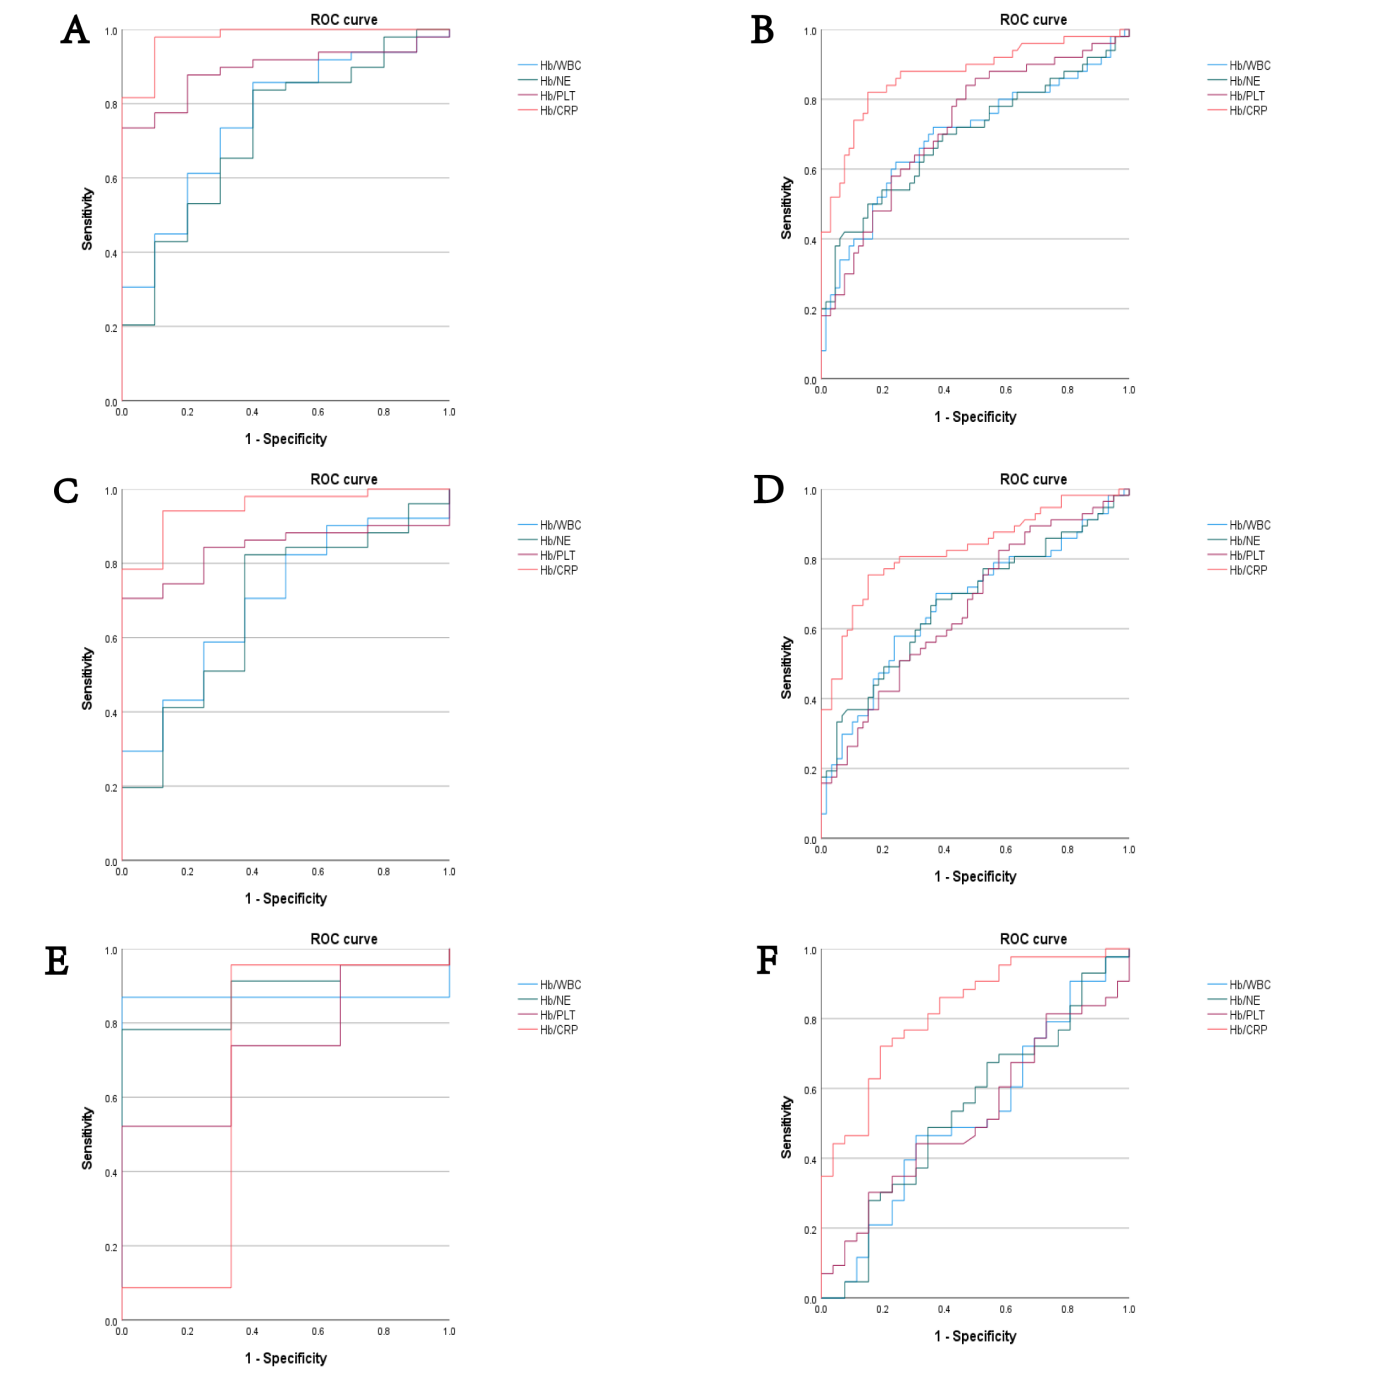


Supplementary Figure 3 ROC curves of sensitivity analyses stratified by anemia status. A: ROC curves of Hb/WBC, Hb/Neu, Hb/PLT, and Hb/CRP for UC endoscopic activity defined by Mayo Endoscopic Score in patients with anemia: Hb/WBC (AUC=0.759, 95% CI: 0.604-0.915, P=0.010), Hb/Neu (AUC=0.724, 95% CI: 0.553-0.896, P=0.026), Hb/PLT (AUC=0.892, 95% CI: 0.809-0.975, P<0.001), Hb/CRP (AUC=0.978, 95% CI: 0.939-1.000, P<0.001). B: ROC curves in patients without anemia: Hb/WBC (AUC=0.695, 95% CI: 0.593-0.796, P<0.001), Hb/Neu (AUC=0.694, 95% CI: 0.593-0.795, P<0.001), Hb/PLT (AUC=0.723, 95% CI: 0.629-0.817, P<0.001), Hb/CRP (AUC=0.871, 95% CI: 0.802-0.940, P<0.001). C: ROC curves for UC endoscopic activity defined by UCEIS in patients with anemia: Hb/WBC (AUC=0.699, 95% CI: 0.521-0.876, P=0.073), Hb/Neu (AUC=0.684, 95% CI: 0.488-0.880, P=0.097), Hb/PLT (AUC=0.841, 95% CI: 0.741-0.941, P=0.002), Hb/CRP (AUC=0.951, 95% CI: 0.891-1.000, P<0.001). D: ROC curves in patients without anemia: Hb/WBC (AUC=0.674, 95% CI: 0.575-0.773, P=0.001), Hb/Neu (AUC=0.677, 95% CI: 0.578-0.775, P=0.001), Hb/PLT (AUC=0.661, 95% CI: 0.562-0.759, P=0.003), Hb/CRP (AUC=0.829, 95% CI: 0.752-0.905, P<0.001). E: ROC curves for CD endoscopic activity defined by SES-CD in patients with anemia: Hb/WBC (AUC=0.870, 95% CI: 0.732-1.000, P=0.041), Hb/Neu (AUC=0.884, 95% CI: 0.744-1.000, P=0.033), Hb/PLT (AUC=0.739, 95% CI: 0.494-0.984, P=0.185), Hb/CRP (AUC=0.667, 95% CI: 0.196-1.000, P=0.356). F: ROC curves in patients without anemia: Hb/WBC (AUC=0.519, 95% CI: 0.375-0.662, P=0.795), Hb/Neu (AUC=0.538, 95% CI: 0.395-0.682, P=0.594), Hb/PLT (AUC=0.524, 95% CI: 0.386-0.662, P=0.743), Hb/CRP (AUC=0.821, 95% CI: 0.722-0.920, P<0.001).
